# Supplementary material
Source: publisher site journal article supplement (https://www.dovepress.com/get_supplementary_file.php?f=253811.xlsx)
Supplement: Supplementary file 1 [file get_supplementary_file.php]

## Sheet: tetracycline
MIC	AD	MD-manual	MD-auto
>32	31	37	28
32	9	4	8
16	3	2	2
8			4
4	1	14	3
2	51	56	50
1	54	43	51
0.5	14	9	17
<0.25	5	1	2

## Sheet: ciprofloxacin
MIC	AD	MD-manual	MD-auto
>64		1	3
64	3	9	6
32	13	51	48
16	60	63	56
8	45	26	35
4	24	7	7
2	12		2
1	1
0.5			1
0.25			1
0.125		2	2
0.06	2		2
<0.03	8	7	2

## Sheet: spectinomycin
MIC	AD	MD-manual	MD-auto
>64	1
32	51
16	115	152	104
8	1	14	51
4			5
2			1
<2			4

## Sheet: ceftriaxone
MIC	AD	MD-manual	MD-auto
>1			1
0.5	1
0.25	3	1	1
0.125	6	3	2
0.06	30	15	3
0.03	62	65	35
0.0015	34	43	60
0.008	22	26	28
0.004	5	11	17
0.002	3	1	11
0.001	1	1	8
<0.0005	1

## Sheet: azithromycin
MIC	AD	MD-manual	MD-auto
>8	1	1	1
4	2	2
2	2	6	7
1	6	10	6
0.5	17	66	39
0.25	44	35	40
0.125	52	43	60
0.06	37	2	6
0.03	2	1	1
<0.03	5		5

## Sheet: penicillin
MIC	AD	MD-manual	MD-auto
>32	4	7	9
32	1	3
16	8	5	1
8	5	5	4
4	3	2	2
2	4	2	1
1	30	31	11
0.5	27	16	26
0.25	5	15	11
0.125	2	2	4
0.06		1	1
0.03		2	2
0.015	1
<0.015	1		1
